# Supplementary material for: A polymer electrolyte-skinned active material strategy toward high-voltage lithium ion batteries: a polyimide-coated LiNi0.5Mn1.5O4 spinel cathode material case
Source: Royal Society of Chemistry journal article supplement (doi:10.1039/c2ee03389e), 2012-01-01
Supplement: c2ee03389e.pdf [file c2ee03389e.pdf]

## Supporting Information

### Polymer electrolyte-skinned active material strategy toward high-voltage lithium ion batteries: polyimide-coated $\text{LiNi}_{0.5}\text{Mn}_{1.5}$ spinel cathode material case

Ju-Hyun Cho,<sup>a</sup> Jang-Hoon Park,<sup>a</sup> Myeong-Hee Lee,<sup>b</sup> Hyun-Kon Song,<sup>\*b</sup> Sang-Young Lee<sup>\*a</sup>

<sup>a</sup> Department of Chemical Engineering, Kangwon National University, Chuncheon, Kangwon 200-701, Korea. E-mail: syleek@kangwon.ac.kr

<sup>b</sup> i-School of Green Energy, UNIST, Ulsan 698-798, Korea. E-mail: philiphobi@hotmail.com

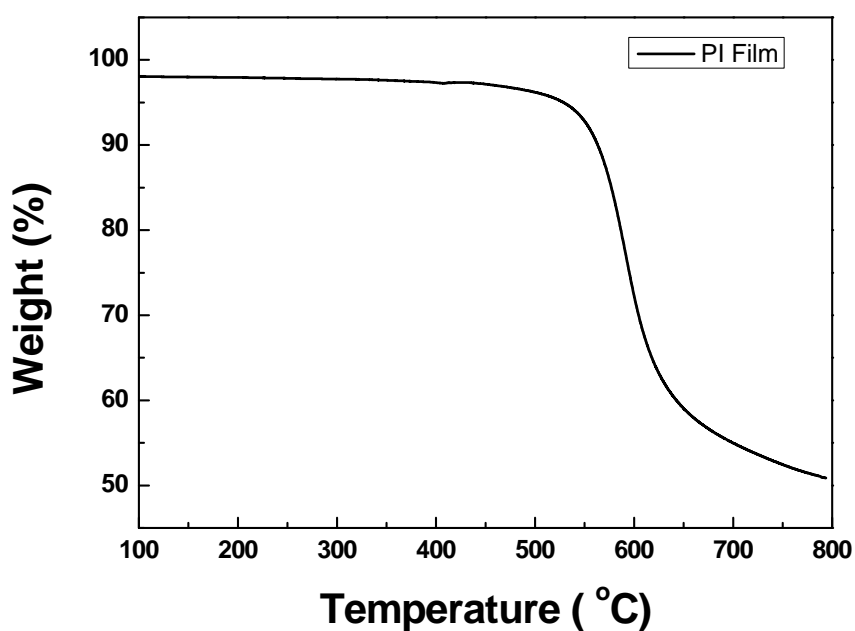

Fig. S1. Mass change of a PI film as a function of temperature under  $\text{N}_2$  atmosphere obtained by thermogravimetric analysis (TGA). No significant changes were observed at least up to 550 °C.

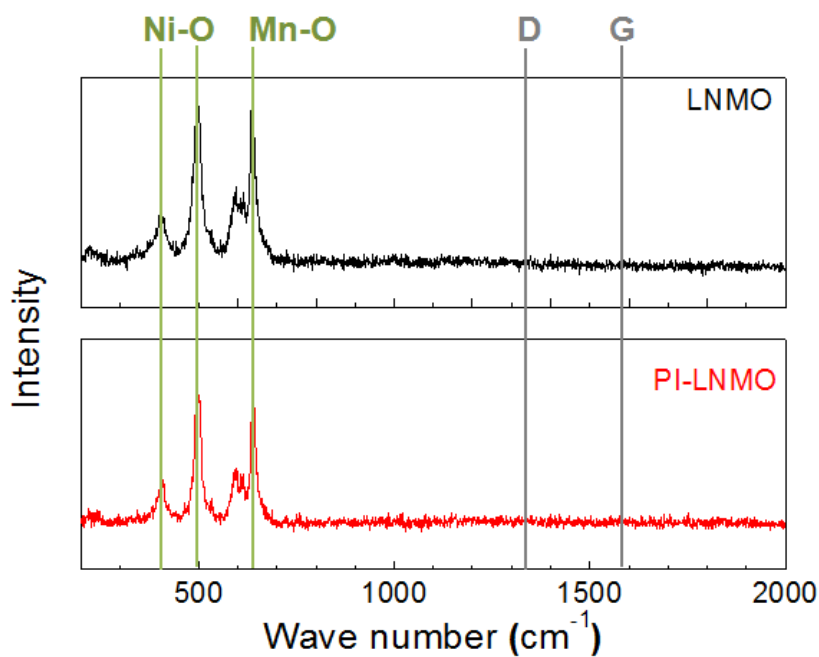

Fig. S2. Raman spectra of LNMO and PI-LNMO. There were no significant changes of peaks related to Ni-O, Mn-O and carbon (D and G bands).

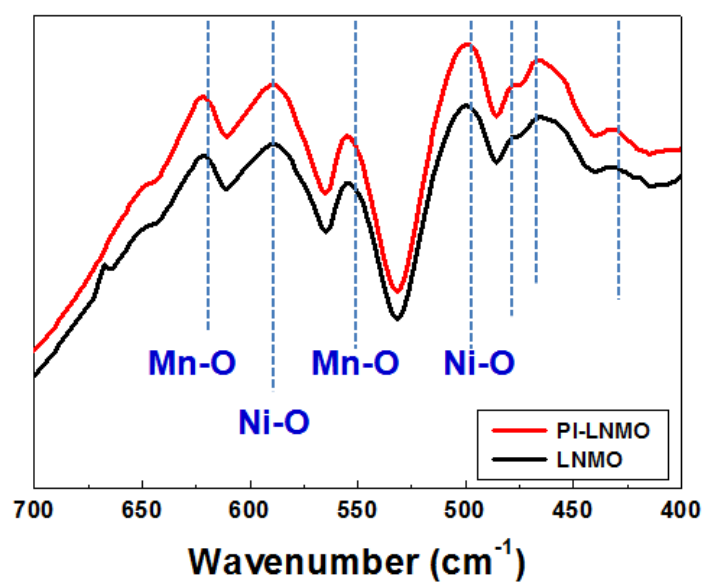

Fig. S3. FT-IR spectra of bare LNMO and PI-LNMO, where the characteristic peak assigned to the Mn-O and Ni-O.

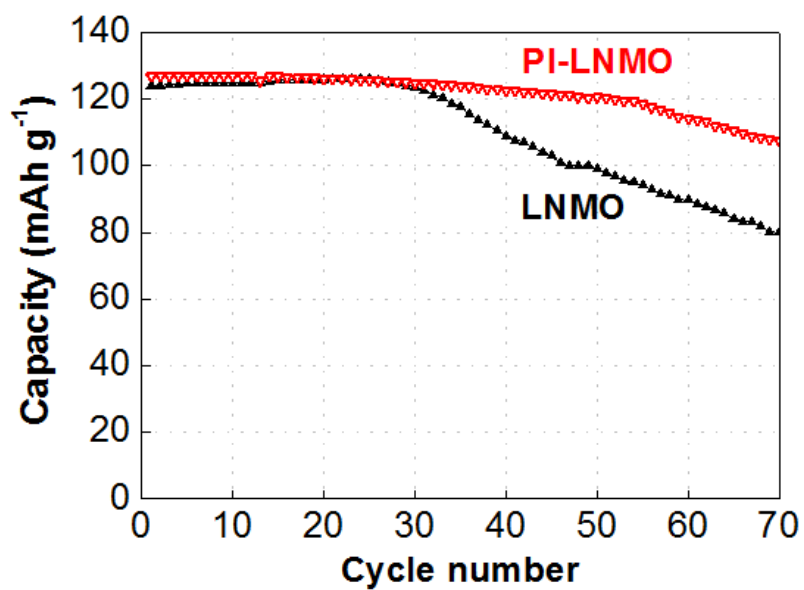

Fig. S4. Discharge capacities (charge/discharge current density = 1.0 C/1.0 C) as a function of cycle number for cells assembled with pristine or PI-LNMO under a voltage range of 3.5 – 4.9 V at 55 °C. This figure shows more extended cyclability of Fig. 6b.
